# Supplementary material
Source: PubMed Central journal article supplement (PMC7141083)
Supplement: NIHMS1051189-supplement-Supplemental_Tables.pdf [file NIHMS1051189-supplement-Supplemental_Tables.pdf]

**Table S1: Primers sequences**

| Gene                         | Sense                  | Antisense               |
|------------------------------|------------------------|-------------------------|
| <i>CXCL10</i>                | GTGGCATTCAAGGAGTACCTC  | TGATGGCCTTCGATTCTGGATT  |
| <i>CCL5</i>                  | CCAGCAGTCGTCTTTGTCAC   | CTCTGGGTTGGCACACACTT    |
| <i>IFN<math>\beta</math></i> | ATGACCAACAAGTGTCTCCTCC | GGAATCCAAGCAAGTTGTAGCTC |

**Table S2: List of antibodies used for flow cytometry**

| <b>Si. No</b> | <b>Antibody</b> | <b>Color</b>  | <b>Company</b> | <b>Cat#</b>  |
|---------------|-----------------|---------------|----------------|--------------|
| 1.            | CD62L           | FITC          | E-BIOSCIENCES  | 11-0621-85   |
| 2.            | FOXP3           | PerCp Cy5.5   | E-BIOSCIENCES  | 45-5773-821  |
| 3.            | TIM3            | PE            | BIOLEGEND      | 134004       |
| 4.            | CD3             | PE/DAZZLE     | BIOLEGEND      | 100246       |
| 5.            | CD8             | PE/Cy7        | BIOLEGEND      | 100722       |
| 6.            | CD44            | APC           | BIOLEGEND      | 10311        |
| 7.            | CD4             | APC/Cy7       | BIOLEGEND      | 100526       |
| 8.            | CD45            | PACIFIC BLUE  | BIOLEGEND      | 103126       |
| 9.            | PD-1            | BV605         | BIOLEGEND      | 35220        |
| 10.           | CD69            | BV650         | BIOLEGEND      | 104541       |
| 11.           | CD25            | BUV395        | BD BIOSCIENCES | 564022       |
| 12.           | GR-1            | BV711         | Biolegend      | 108443       |
| 13.           | CD11c           | BV786         | Biolegend      | 117335       |
| 14.           | CD11b           | BV650         | Biolegend      | 101239       |
| 15.           | F4/80           | APC           | Tonobo         | 20-4801-U100 |
| 16.           | PDL1            | PE-Dazzle 594 | Biolegend      | 124323       |
| 17.           | CD86            | APC-Cy7       | Biolegend      | 105030       |
| 18.           | MHCII           | PE-Cy7        | Biolegend      | 107629       |
| 19.           | CD80            | BV605         | Biolegend      | 104729       |
| 20.           | CD68            | PerCP-Cy5.5   | Biolegend      | 137009       |
| 21.           | Arg1            | FITC          | RD system      | IC5868F      |
| 22.           | iNOS            | PE            | Invitrogen     | 12-5920-80   |
