# Supplementary material
Source: PubMed Central journal article supplement (PMC7141083)

**Figure S1**

**A**

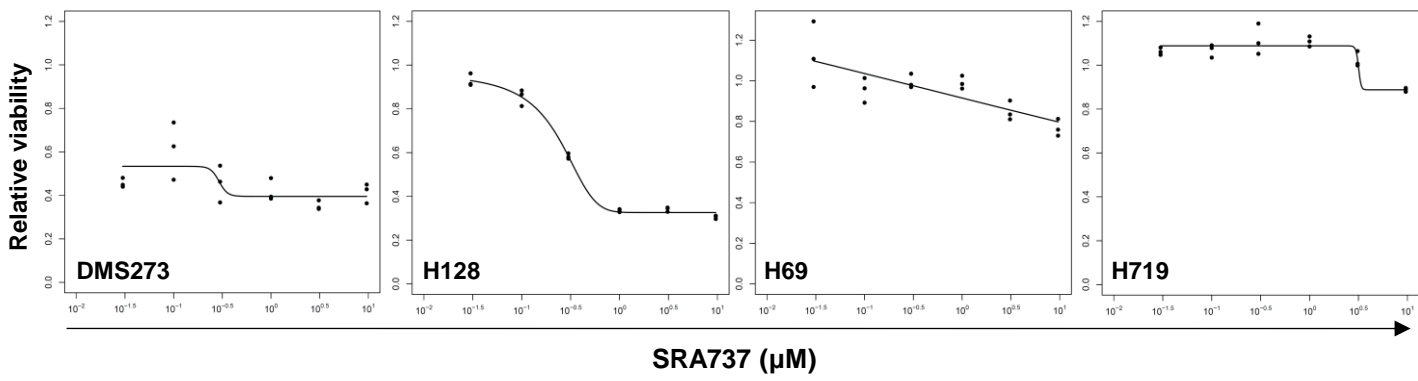

**B**

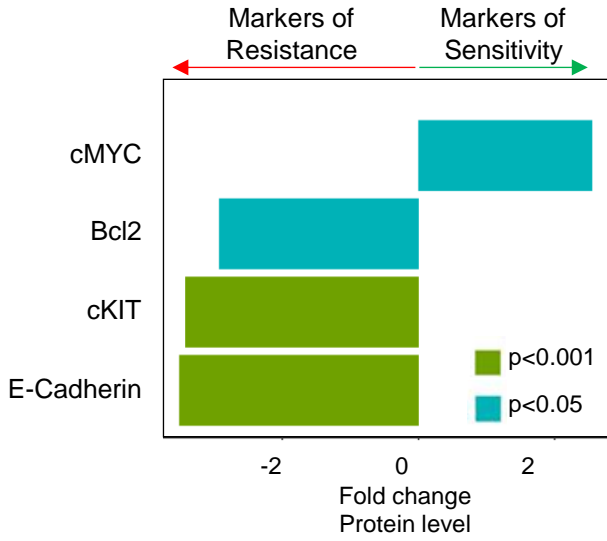

**C**

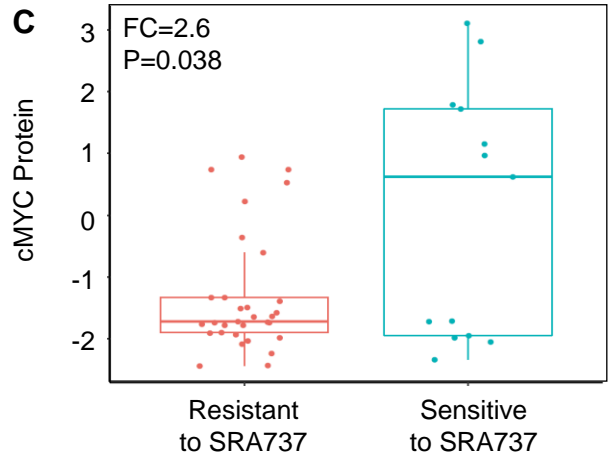

**Figure S2**

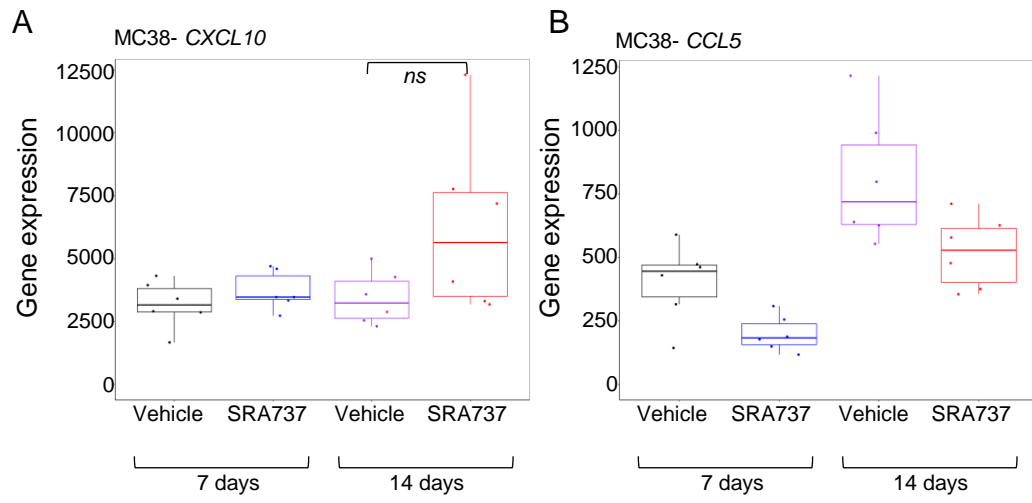

# Figure S3

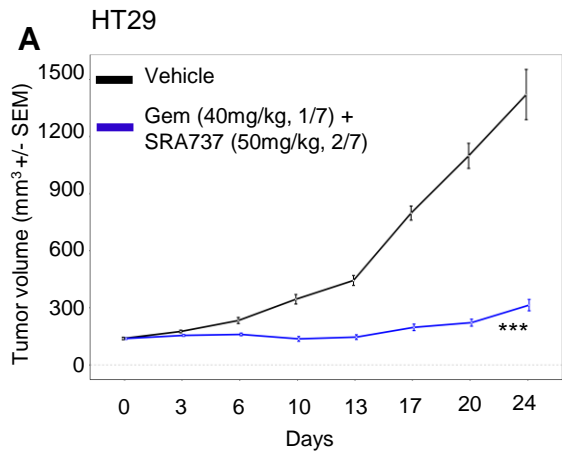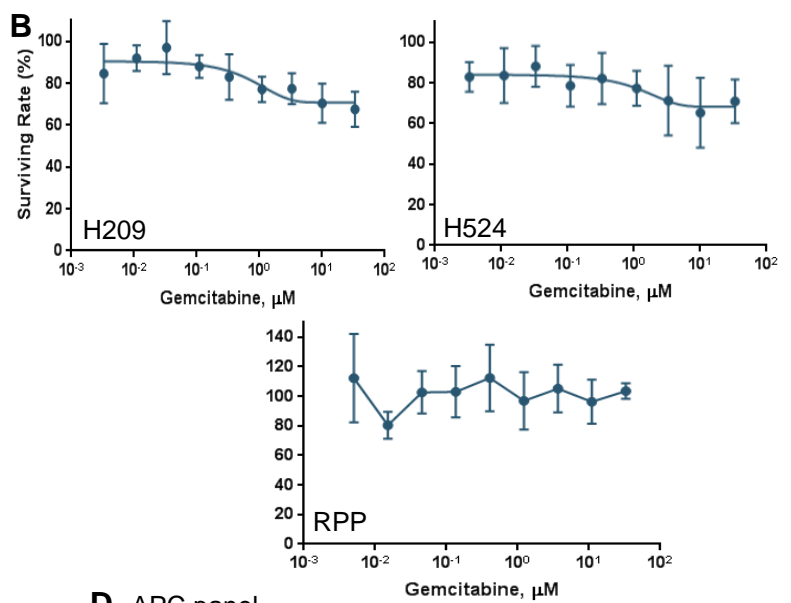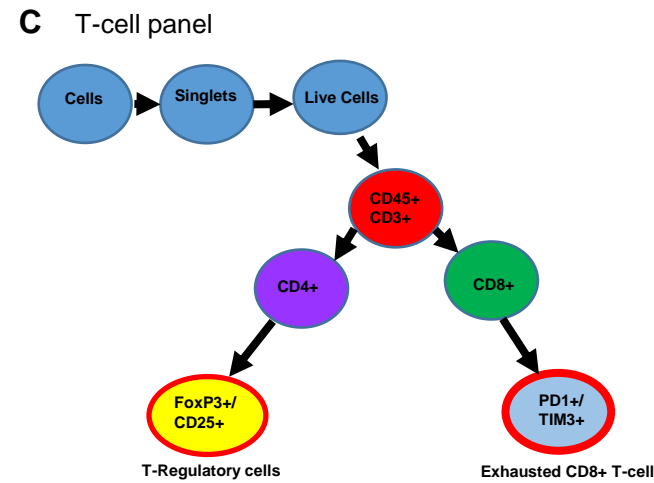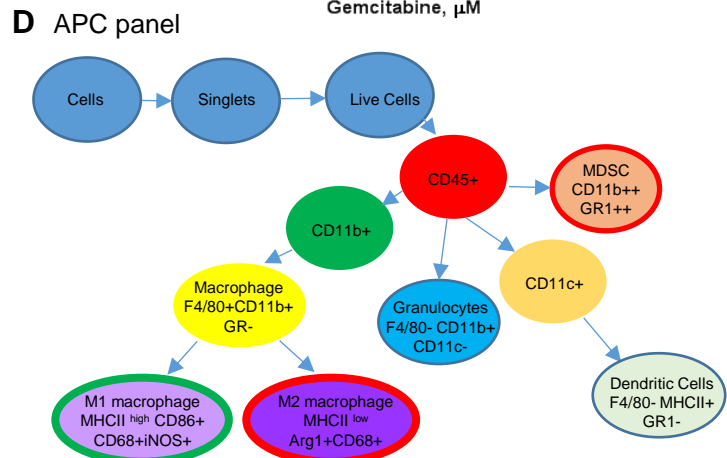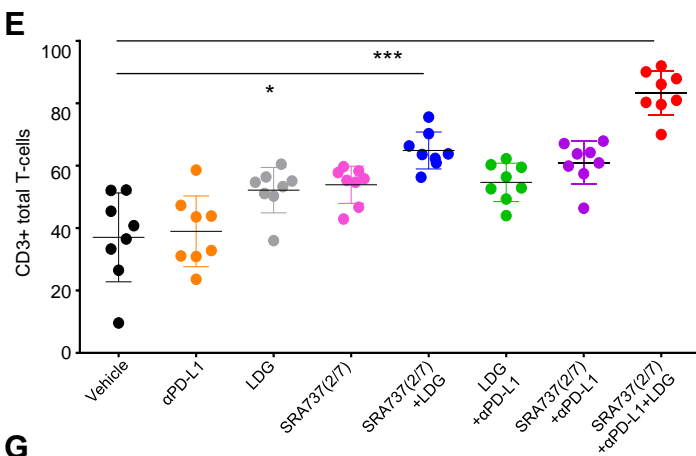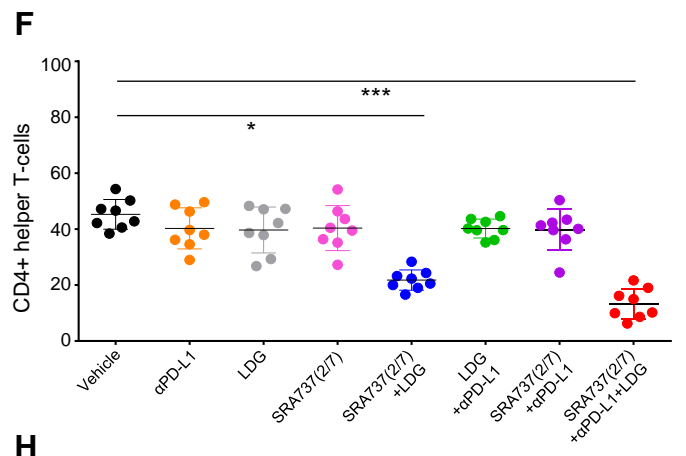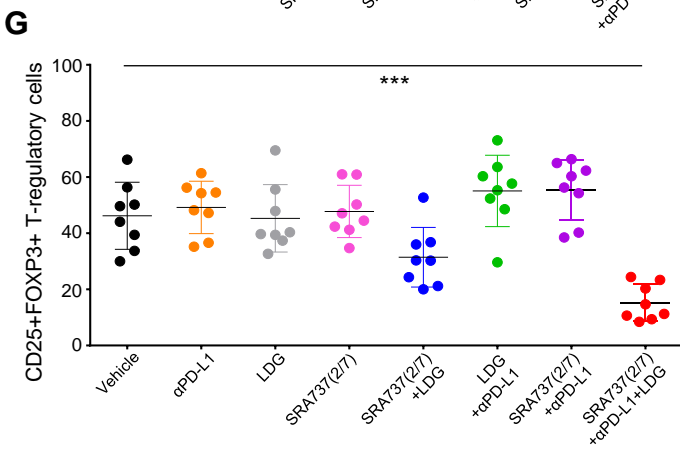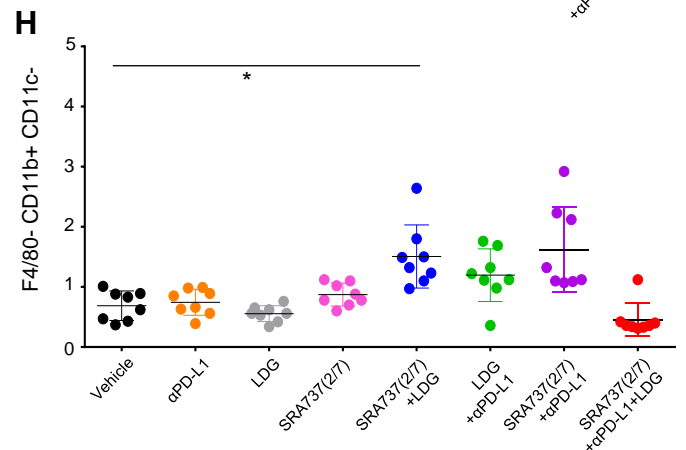

Supplement: NIHMS1051189-supplement-1.pdf [file NIHMS1051189-supplement-1.pdf]
